# Supplementary material
Source: publisher figshare collection journal article supplement (https://diabetesjournals.figshare.com/articles/dataset/_/16652587)
Supplement: Supplementary file 1 [file 1]

**eFigure 1.** Consort figure for DPP/DPPOS

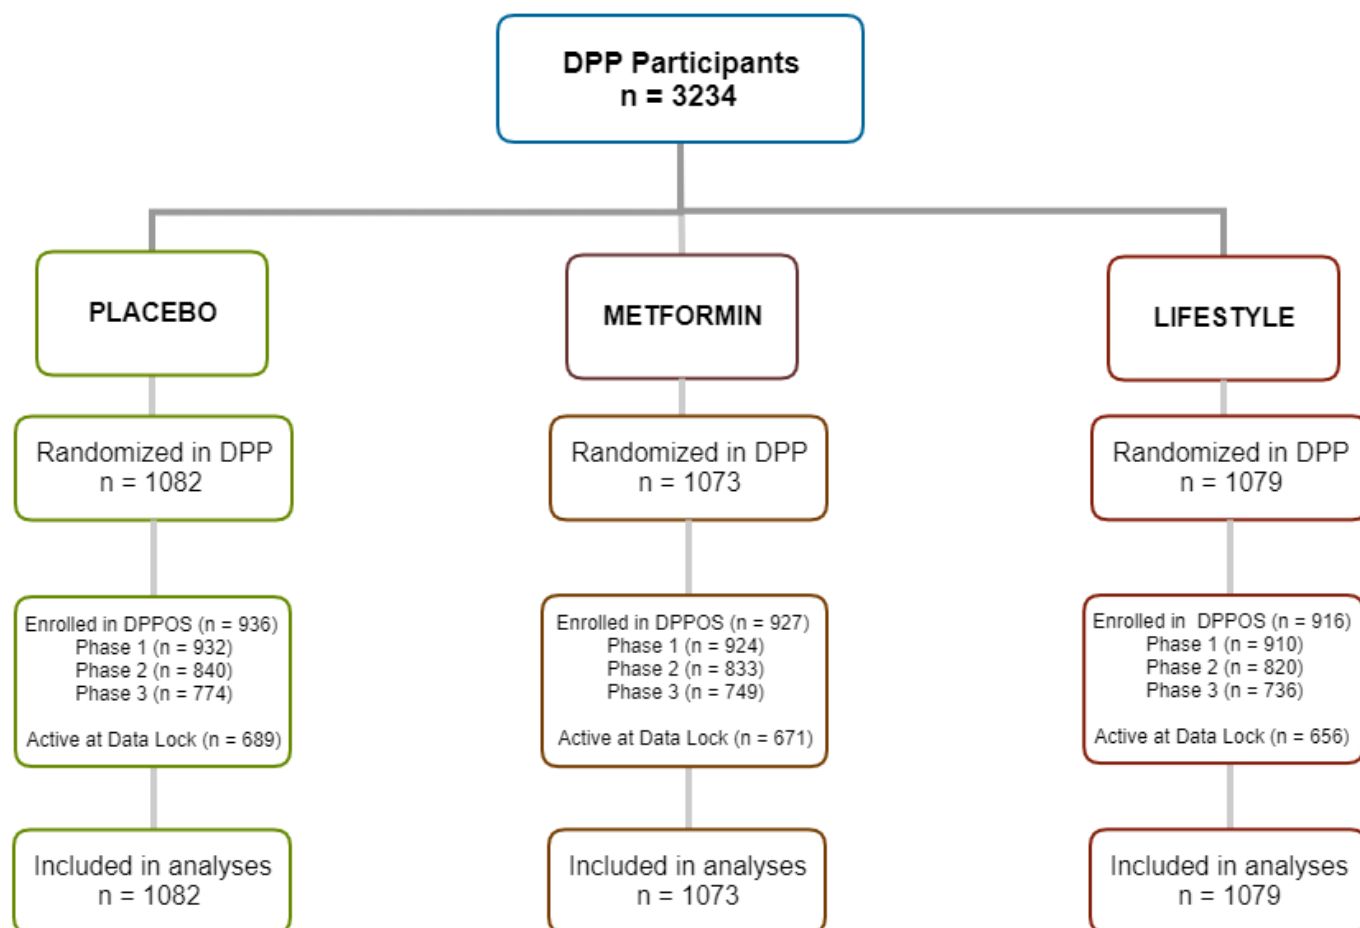

All randomized participants were included in the analyses. The number in each phase of DPPOS represent surviving participants who had study visits. Visits were conducted in Phase 1 in 2002-2008, Phase 2 in 2008-2014, and Phase 3 in 2014-2022.

eTable 1. All-cause Mortality by Pre-Specified Subgroups

|                          | N (%)        | Event Rate per 1000 person-years |           |           | Hazard Ratio (95% CI)* |                       |
|--------------------------|--------------|----------------------------------|-----------|-----------|------------------------|-----------------------|
|                          |              | Placebo                          | Lifestyle | Metformin | Metformin vs. Placebo  | Lifestyle vs. Placebo |
| Overall                  | 3234 (100%)  | 6.59                             | 7.37      | 7.13      | 1.08 (0.86,1.36)       | 1.12 (0.90,1.41)      |
| Age randomized in years  |              |                                  |           |           |                        |                       |
| 25 to < 45               | 1000 (30.9%) | 2.39                             | 1.99      | 2.04      | 0.83 (0.40,1.73)       | 0.85 (0.42,1.73)      |
| 45 to <60                | 1586 (49.0%) | 4.68                             | 5.65      | 5.07      | 1.21 (0.84,1.75)       | 1.08 (0.74,1.60)      |
| 60 plus                  | 648 (20.0%)  | 20.19                            | 19.65     | 22.04     | 0.96 (0.70,1.33)       | 1.12 (0.82,1.51)      |
| Sex                      |              |                                  |           |           |                        |                       |
| Women                    | 2191 (67.7%) | 5.03                             | 5.34      | 4.96      | 0.99 (0.72,1.37)       | 1.07 (0.78,1.46)      |
| Men                      | 1043 (32.3%) | 10.19                            | 11.89     | 11.55     | 1.13 (0.82,1.57)       | 1.17 (0.84,1.62)      |
| Race                     |              |                                  |           |           |                        |                       |
| White                    | 1768 (54.7%) | 7.75                             | 9.56      | 8.89      | 1.14 (0.86,1.52)       | 1.24 (0.94,1.64)      |
| African American         | 645 (19.9%)  | 6.57                             | 6.67      | 4.75      | 0.72 (0.41,1.26)       | 1.02 (0.60,1.72)      |
| Hispanic                 | 508 (15.7%)  | 4.66                             | 4.76      | 4.83      | 1.04 (0.52,2.08)       | 1.03 (0.52,2.04)      |
| American Indian          | 171 (5.3%)   | 2.48                             | 0.80      | 3.80      | 1.56 (0.35,6.99)       | 0.31 (0.03,3.03)      |
| Asian American           | 142 (4.4%)   | 4.91                             | 3.39      | 8.38      | 1.72 (0.52,5.63)       | 0.68 (0.18,2.55)      |
| BMI in kg/m <sup>2</sup> |              |                                  |           |           |                        |                       |
| 25 to 29                 | 953 (30.4%)  | 7.45                             | 7.48      | 8.67      | 1.16 (0.79,1.72)       | 1.00 (0.67,1.50)      |
| 30 to 34                 | 993 (31.6%)  | 7.15                             | 8.70      | 7.53      | 1.05 (0.71,1.57)       | 1.23 (0.83,1.82)      |
| 35+                      | 1193 (38.0%) | 5.21                             | 6.21      | 5.67      | 1.08 (0.71,1.64)       | 1.18 (0.79,1.77)      |

\*All hazard ratios are unadjusted.

eTable 2. Adjusted Effects of Metformin and Lifestyle on All-Cause Mortality

| Models*                                           | Hazard ratio (95% CI) for Metformin vs Placebo | Hazard ratio (95% CI) for Lifestyle vs Placebo |
|---------------------------------------------------|------------------------------------------------|------------------------------------------------|
| Model A1: Unadjusted                              | 1.08 (0.86, 1.36)                              | 1.12 (0.90,1.41)                               |
| Model A2: Demographics                            | 0.99 (0.79, 1.25)                              | 1.02 (0.81, 1.28)                              |
| Model A3: Model A2+ Out-of-study metformin        | 0.97 (0.77, 1.23)                              | 1.02 (0.81, 1.27)                              |
| Model A4: Model A3 + Diabetes status and duration | 0.97 (0.77, 1.23)                              | 1.02 (0.81, 1.28)                              |
| Model A5: Model A4+ Body mass index               | 0.97 (0.77, 1.23)                              | 1.02 (0.81, 1.28)                              |
| Model A6: Model A5 + Hemoglobin A1c               | 0.97 (0.77, 1.23)                              | 1.02 (0.81, 1.28)                              |
| Model A7: Model A6 + fully adjusted               | 0.98 (0.77, 1.23)                              | 1.03 (0.82, 1.29)                              |

\* Models A3-A7 include time dependent risk factors. Model A7 include additional adjustment for time-dependent log (albumin-to-creatinine ratio), estimated glomerular filtration rate, hypertension, dyslipidemia, smoking and alcohol use.
